# Supplementary material for: Glycolysis, but not Mitochondria, responsible for intracellular ATP distribution in cortical area of podocytes
Source: PubMed Central journal article supplement (PMC4683464; doi:10.1038/srep18575), 2015-12-18
Supplement: srep18575-s1.pdf [file srep18575-s1.pdf]

**Glycolysis, but not Mitochondria, responsible for intracellular ATP distribution in cortical area of podocytes**

Shota Ozawa<sup>1,2</sup>, Shuko Ueda<sup>3</sup>, Hiromi Imamura<sup>4</sup>, Kiyoshi Mori<sup>1</sup>, Katsuhiko Asanuma<sup>1</sup>, Motoko Yanagita<sup>1,5</sup> & Takahiko Nakagawa<sup>1,\*</sup>

<sup>1</sup>TMK project, Medical Innovation Center, Kyoto University, Kyoto, Japan

<sup>2</sup>Pharmacology Research Laboratories II, Mitsubishi Tanabe Pharma Corporation, Saitama, Japan

<sup>3</sup>Department of Internal Medicine, Teikyo University School of Medicine, Tokyo, Japan

<sup>4</sup>Laboratory of Functional Biology, Graduate School of Biostudies, Kyoto University, Kyoto, Japan

<sup>5</sup>Department of Nephrology, Kyoto University Graduate School of Medicine, Kyoto, Japan

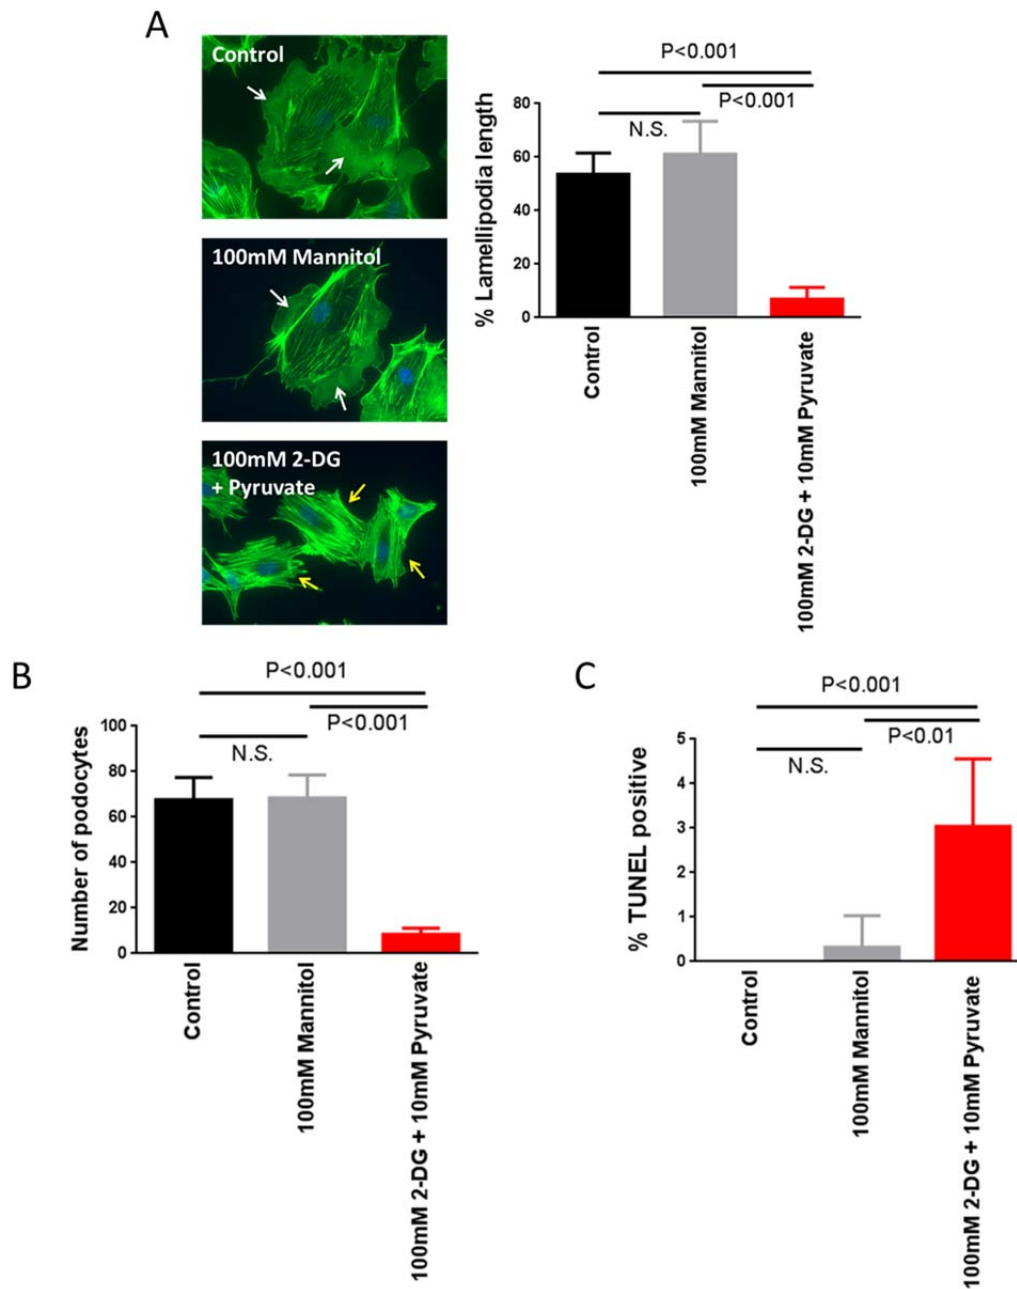

**Supplemental Figure 1: Hyperosmolarity has no effects on lamellipodia formation, migratory ability and cell survival in the cultured podocytes.** At 24 h, the lamellipodia formation (white arrow) is maintained with either control or 100mM Mannitol while it is not seen with 100mM 2-DG with 10mM Pyruvate (yellow arrow) (A). Likewise, 100mM Mannitol has no effects on podocyte migration in scratch assay (B) and the number of TUNEL-positive cells (C) in contrast to 100mM 2-DG with 10mM Pyruvate.

Fig. 1C

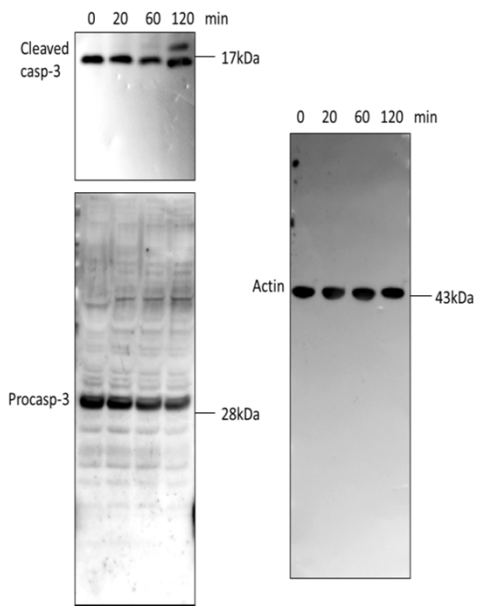

Fig. 3H

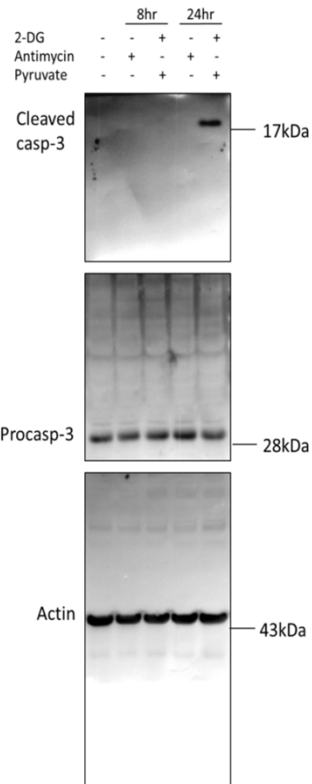

Fig. 4A

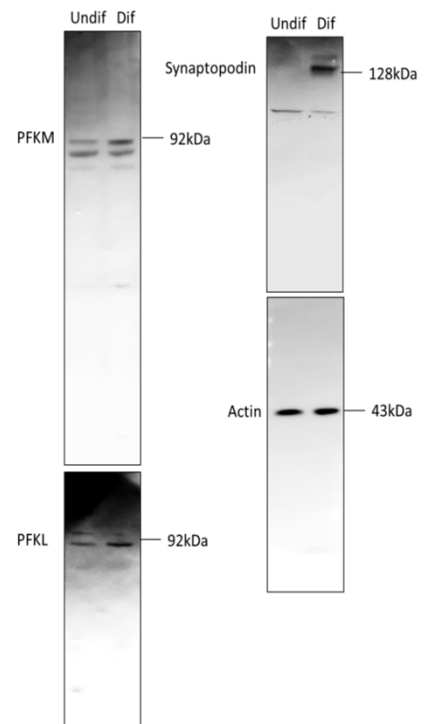

Fig. 4B

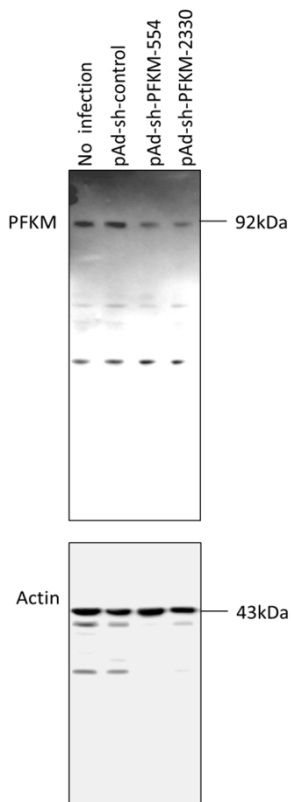

Fig. 4C

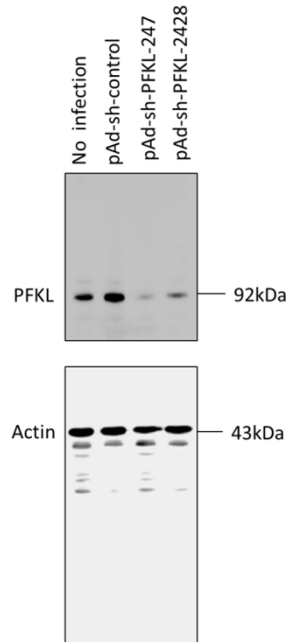

**Supplemental Figure 2:**  
Original blots for each  
figure are shown.
